# Supplementary material for: Computational identification and validation of alternative splicing in ZSF1 rat RNA-seq data, a preclinical model for type 2 diabetic nephropathy
Source: PubMed Central journal article supplement (PMC5955895; doi:10.1038/s41598-018-26035-x), 2018-05-16
Supplement: 41598_2018_26035_MOESM1_ESM.pdf [file 41598_2018_26035_MOESM1_ESM.pdf]

## Computational identification and validation of alternative splicing in ZSF1 rat RNA-seq data, a preclinical model for type 2 diabetic nephropathy

Chi Zhang, Ken Dower, Baohong Zhang, Robert Martinez, Lih-Ling Lin and Shanrong Zhao

**Table S1. Descriptions on RNA-seq samples and the library size of sequencing**

| Sample       | Reads    | Type  | Week | Sample       | Reads    | Type  | Week |
|--------------|----------|-------|------|--------------|----------|-------|------|
| A1-PFE-ZSF1  | 88112024 | lean  | 12   | D1-PFE-ZSF1  | 88136478 | lean  | 29   |
| A2-PFE-ZSF1  | 87994026 | lean  | 12   | D2-PFE-ZSF1  | 88543794 | lean  | 29   |
| A3-PFE-ZSF1  | 87920290 | lean  | 12   | D3-PFE-ZSF1  | 88013002 | lean  | 29   |
| A4-PFE-ZSF1  | 88143212 | lean  | 12   | D4-PFE-ZSF1  | 87497798 | lean  | 29   |
| A5-PFE-ZSF1  | 87606542 | lean  | 12   | D5-PFE-ZSF1  | 88744782 | lean  | 29   |
| A6-PFE-ZSF1  | 86325474 | obese | 12   | D6-PFE-ZSF1  | 88895756 | obese | 29   |
| A7-PFE-ZSF1  | 86286378 | obese | 12   | D7-PFE-ZSF1  | 89176152 | obese | 29   |
| A8-PFE-ZSF1  | 88134058 | obese | 12   | D8-PFE-ZSF1  | 89286744 | obese | 29   |
| A9-PFE-ZSF1  | 90169140 | obese | 12   | D9-PFE-ZSF1  | 89591378 | obese | 29   |
| A10-PFE-ZSF1 | 88116962 | obese | 12   | D10-PFE-ZSF1 | 89392328 | obese | 29   |
| B1-PFE-ZSF1  | 87998376 | lean  | 20   | E1-PFE-ZSF1  | 89389008 | lean  | 34   |
| B2-PFE-ZSF1  | 88106294 | lean  | 20   | E2-PFE-ZSF1  | 89317832 | lean  | 34   |
| B3-PFE-ZSF1  | 89640408 | lean  | 20   | E3-PFE-ZSF1  | 89375118 | lean  | 34   |
| B4-PFE-ZSF1  | 89593368 | lean  | 20   | E4-PFE-ZSF1  | 86947992 | lean  | 34   |
| B5-PFE-ZSF1  | 89335280 | lean  | 20   | E5-PFE-ZSF1  | 89474602 | lean  | 34   |
| B6-PFE-ZSF1  | 87611102 | obese | 20   | E6-PFE-ZSF1  | 87178270 | obese | 34   |
| B7-PFE-ZSF1  | 87554564 | obese | 20   | E7-PFE-ZSF1  | 88859810 | obese | 34   |
| B8-PFE-ZSF1  | 87382592 | obese | 20   | E8-PFE-ZSF1  | 85905608 | obese | 34   |
| B9-PFE-ZSF1  | 87430520 | obese | 20   | E9-PFE-ZSF1  | 87504152 | obese | 34   |
| B10-PFE-ZSF1 | 87575600 | obese | 20   | E10-PFE-ZSF1 | 85926790 | obese | 34   |
| C1-PFE-ZSF1  | 89504534 | lean  | 24   | F1-PFE-ZSF1  | 88440452 | lean  | 41   |
| C2-PFE-ZSF1  | 87055654 | lean  | 24   | F2-PFE-ZSF1  | 87786394 | lean  | 41   |
| C3-PFE-ZSF1  | 87918752 | lean  | 24   | F3-PFE-ZSF1  | 87663194 | lean  | 41   |
| C4-PFE-ZSF1  | 88108878 | lean  | 24   | F4-PFE-ZSF1  | 87558780 | lean  | 41   |
| C5-PFE-ZSF1  | 89914574 | lean  | 24   | F6-PFE-ZSF1  | 87731544 | obese | 41   |
| C6-PFE-ZSF1  | 87804330 | obese | 24   | F7-PFE-ZSF1  | 87783398 | obese | 41   |
| C7-PFE-ZSF1  | 90019774 | obese | 24   | F8-PFE-ZSF1  | 89252478 | obese | 41   |
| C8-PFE-ZSF1  | 88358488 | obese | 24   |              |          |       |      |
| C9-PFE-ZSF1  | 87779510 | obese | 24   |              |          |       |      |
| C10-PFE-ZSF1 | 88641626 | obese | 24   |              |          |       |      |

**Table S2. Statistical analysis (for genes Shc1, Serpinc1, and Epb4.1l5 ) between obese and lean groups across time points. Note the unit for difference is TPM; and only those time points with statistical significant are listed.**

| Gene_Name | Week | Entity  | ID                 | Difference | P_Value  |
|-----------|------|---------|--------------------|------------|----------|
| Shc1      | 12   | Gene    | ENSRNOG00000020657 | -2.33      | 5.40E-01 |
| Shc1      | 12   | Isoform | ENSRNOT00000028038 | -3.22      | 1.00E-02 |
| Shc1      | 12   | Isoform | ENSRNOT00000056652 | 0.89       | 7.48E-01 |
| Shc1      | 20   | Gene    | ENSRNOG00000020657 | -3.11      | 1.90E-01 |
| Shc1      | 20   | Isoform | ENSRNOT00000028038 | -2.35      | 4.60E-03 |
| Shc1      | 20   | Isoform | ENSRNOT00000056652 | -0.75      | 6.48E-01 |
| Shc1      | 29   | Gene    | ENSRNOG00000020657 | -1.90      | 3.65E-01 |
| Shc1      | 29   | Isoform | ENSRNOT00000028038 | -3.08      | 3.47E-05 |
| Shc1      | 29   | Isoform | ENSRNOT00000056652 | 1.18       | 4.72E-01 |
| Shc1      | 34   | Gene    | ENSRNOG00000020657 | 11.65      | 7.83E-06 |
| Shc1      | 34   | Isoform | ENSRNOT00000028038 | 1.10       | 9.24E-03 |
| Shc1      | 34   | Isoform | ENSRNOT00000056652 | 10.55      | 3.26E-06 |
| Shc1      | 41   | Gene    | ENSRNOG00000020657 | 5.64       | 9.59E-04 |
| Shc1      | 41   | Isoform | ENSRNOT00000028038 | 0.60       | 1.09E-01 |
| Shc1      | 41   | Isoform | ENSRNOT00000056652 | 5.05       | 6.31E-04 |
| Serpinc1  | 34   | Gene    | ENSRNOG00000002783 | 12.66      | 6.83E-02 |
| Serpinc1  | 34   | Isoform | ENSRNOT00000003748 | -9.61      | 1.09E-04 |
| Serpinc1  | 34   | Isoform | ENSRNOT00000046512 | 0.83       | 5.10E-02 |
| Serpinc1  | 34   | Isoform | ENSRNOT00000076043 | 21.45      | 6.03E-03 |
| Serpinc1  | 41   | Gene    | ENSRNOG00000002783 | 5.62       | 2.11E-01 |
| Serpinc1  | 41   | Isoform | ENSRNOT00000003748 | -9.27      | 1.42E-02 |
| Serpinc1  | 41   | Isoform | ENSRNOT00000046512 | 1.23       | 1.94E-02 |
| Serpinc1  | 41   | Isoform | ENSRNOT00000076043 | 13.66      | 4.03E-03 |
| Epb4.1l5  | 12   | Gene    | ENSRNOG00000002538 | 3.21       | 2.38E-02 |
| Epb4.1l5  | 12   | Isoform | ENSRNOT00000003428 | -1.07      | 3.43E-01 |
| Epb4.1l5  | 12   | Isoform | ENSRNOT00000042862 | 4.28       | 2.66E-03 |
| Epb4.1l5  | 20   | Gene    | ENSRNOG00000002538 | 0.10       | 9.05E-01 |
| Epb4.1l5  | 20   | Isoform | ENSRNOT00000003428 | -1.24      | 7.66E-02 |
| Epb4.1l5  | 20   | Isoform | ENSRNOT00000042862 | 1.34       | 1.04E-01 |
| Epb4.1l5  | 34   | Gene    | ENSRNOG00000002538 | 2.60       | 7.01E-02 |
| Epb4.1l5  | 34   | Isoform | ENSRNOT00000003428 | -1.51      | 3.22E-03 |
| Epb4.1l5  | 34   | Isoform | ENSRNOT00000042862 | 4.10       | 7.50E-03 |
| Epb4.1l5  | 41   | Gene    | ENSRNOG00000002538 | 1.96       | 1.24E-01 |
| Epb4.1l5  | 41   | Isoform | ENSRNOT00000003428 | -2.41      | 1.79E-02 |
| Epb4.1l5  | 41   | Isoform | ENSRNOT00000042862 | 4.37       | 1.58E-02 |

**Table S3. Statistical analysis for gene expression, exon inclusion and exclusion between obese and lean groups across time points. Note: the unit for gene expression difference is TPM; whereas the unit for inclusion/exclusion difference are raw read count.**

| <b>Gene_Name</b> | <b>Week</b> | <b>Entity</b> | <b>ID</b>          | <b>Difference</b> | <b>P_Value</b> |
|------------------|-------------|---------------|--------------------|-------------------|----------------|
| Il33             | 12          | Gene          | ENSRNOG00000016456 | 14.63             | 4.24E-03       |
| Il33             | 12          | Exon          | excluded           | 66.00             | 2.31E-03       |
| Il33             | 12          | Exon          | included           | 11.00             | 1.10E-01       |
| Il33             | 20          | Gene          | ENSRNOG00000016456 | 3.56              | 2.77E-01       |
| Il33             | 20          | Exon          | excluded           | 32.60             | 1.78E-02       |
| Il33             | 20          | Exon          | included           | -6.80             | 3.94E-01       |
| Il33             | 24          | Gene          | ENSRNOG00000016456 | 4.32              | 7.71E-02       |
| Il33             | 24          | Exon          | excluded           | 23.80             | 7.12E-02       |
| Il33             | 24          | Exon          | included           | 6.00              | 3.17E-01       |
| Il33             | 29          | Gene          | ENSRNOG00000016456 | 2.63              | 5.22E-01       |
| Il33             | 29          | Exon          | excluded           | -2.80             | 8.98E-01       |
| Il33             | 29          | Exon          | included           | -6.40             | 4.99E-01       |
| Il33             | 34          | Gene          | ENSRNOG00000016456 | 7.93              | 1.04E-02       |
| Il33             | 34          | Exon          | excluded           | 46.20             | 3.74E-02       |
| Il33             | 34          | Exon          | included           | -7.00             | 4.64E-01       |
| Il33             | 41          | Gene          | ENSRNOG00000016456 | -2.03             | 5.57E-01       |
| Il33             | 41          | Exon          | excluded           | -22.67            | 1.90E-01       |
| Il33             | 41          | Exon          | included           | -40.08            | 4.35E-03       |

## Table S4. A list of primer sequences for qRT-PCR validation

### *Il33 unannotated*

Inc (sense probe):

GTAGCAAGCATGAAGGGAGGCTCTCTACCTGTTTACCAGATTCTAGGAAGAGATCCCTGCTTGGCAGTATCCAAGCG  
TTGCTGCATCAGTTGACACACTGAGTATCCAAGattgtaagaaggtaaagaagggaactgtcttctcgttctaccctcactgtgcagg  
aagcgaacacttaatccacccctggatcagGAACTTCACTGCTAACAGAATCTTGTGCCCTGAGCACATACAACGACCAAT  
CTGTTAGTTTTGTTTTGGAGAATGGATGTTACGTGATCAATGTTGAAGATTGTGGGAAAAACCAAGAAAAAG

Ex (forward probe):

GTAGCAAGCATGAAGGGAGGCTCTCTACCTGTTTACCAGATTCTAGGAAGAATCCCTGCTTGGCAGTATCCAAGCG  
TTGCTGCATCAGTTGACACACTGAGTATCCAAGGAACTTCACTGCTAACAGAATCTTGTGCCCTGAGCACATACAAC  
GACCAATCTGTTAGTTTTGTTTTGGAGAATGGATGTTACGTGATCAATGTTGAAGATTGTGGGAAAAACCAAGAAAA  
AG

Com (forward probe):

TAGCAAGCATGAAGGGAGGCTCTCTACCTGTTTACCAGATTCTAGGAAGAGATCCCTGCTTGGCAGTATCCAAGCGT  
TTGCTGCATCAGTTGACACACTGAGTATCCAAGGAACTTCACTGCTAACAGAATCTTGTGCCCTGAGCACATACAAC  
GACCAATCTGTTAGTTTTGTTTTGAGAATGGATGTTACGTGATCAATGTTGAAGATTGTGGGAAAAACCAAGAAAA  
AG

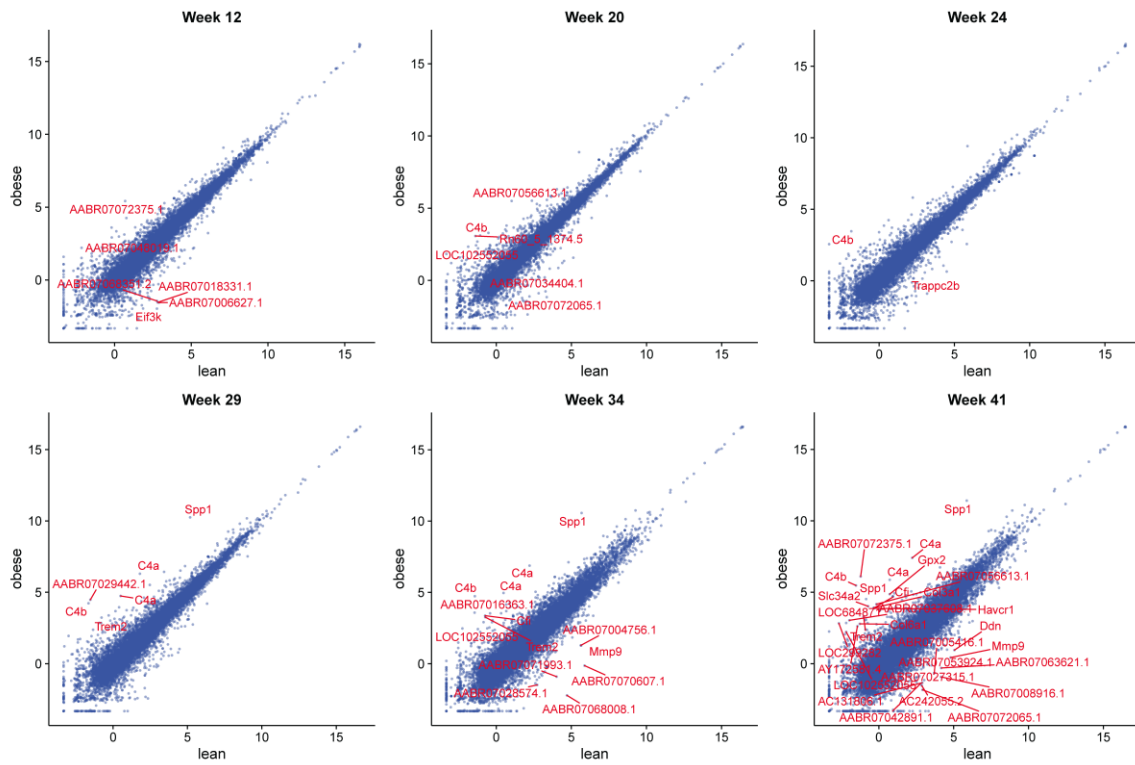

**Figure S1.** Scatter plots of obese versus lean transcript expression at each time point. The group average  $\log_2$ TPM values of obese and lean animals are plotted against one another at each time point. Transcripts with over 16 fold TPM difference are labelled.
